# Supplementary material
Source: PubMed Central journal article supplement (PMC3289335)
Supplement: 1113633109_Appendix.pdf [file 1113633109_Appendix.pdf]

## Supporting Information

### New insights into *cis*-autoproteolysis reveal a reactive state formed through conformational rearrangement

Andrew R Buller, Michael F Freeman, Nathan T Wright, Joel F Schildbach, Craig A Townsend

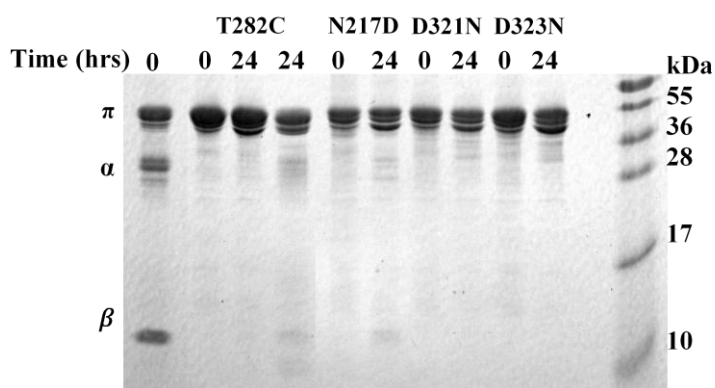

Fig. S1. Mutational disruption of autoproteolysis. Samples run on 15% SDS-PAGE. Lane 1: wt-ThnT, showing the uncleaved ( $\pi$ ) band and the two cleavage products ( $\alpha$ , $\beta$ ); Lane 2-3: T282C; lane 4: T282C + 500mM NH<sub>2</sub>OH; lane 5-6: N217D; lane 7-8: D321N; lane 9-10: D323N; lane 11: Fermentas Pre-stained Protein Ladder (relevant molecular weights on figure).

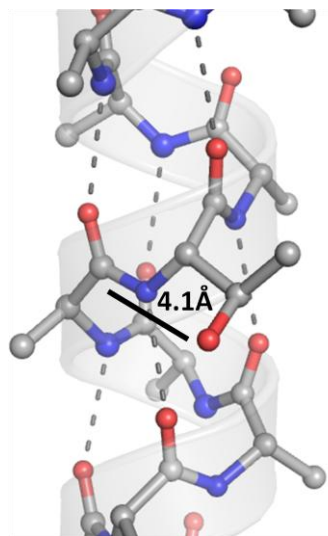

Fig. S2. A threonine residue on a generic  $\alpha$ -helix. The long distance between the reactive atoms and inappropriate geometry readily account for the inability of  $\alpha$ -helices to support *cis*-autoproteolysis without disrupting the hydrogen bond network (grey dashes) of the helix.

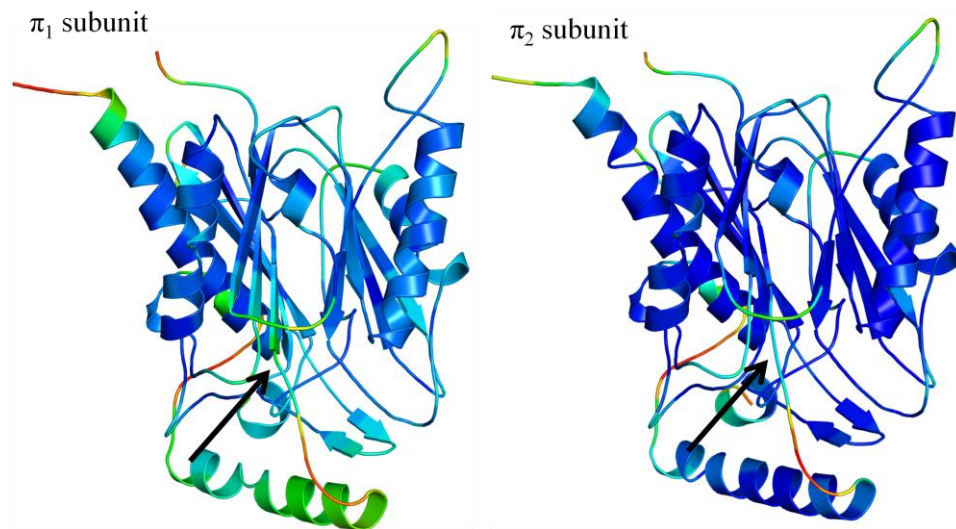

Fig. S3. Ribbon diagram of T282C colored by B-factor of C $\alpha$  from low (blue) to high (red) shows the average thermal motion of the  $\pi_2$  subunit is significantly lower than that of the  $\pi_1$  subunit. The loop leading into the scissile bond (black arrow) is moderately disordered, consistent with its high B-factors and dissociation after autoproteolysis.

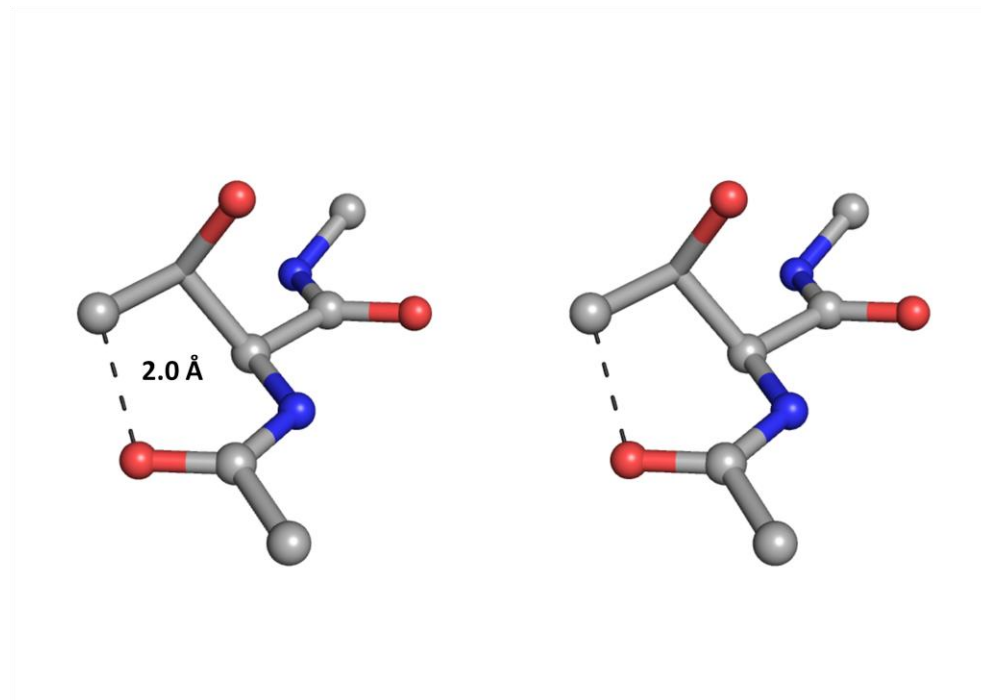

Fig. S4. Stereo view of the reactive rotamer for state B of ThnT. This gives rise to a strong steric clash that prevents formation of this rotamer, precluding autoproteolysis. The backbone angles shown here are similar to those found in the structures of several other Thr-utilizing Ntn hydrolases (PDB ID: 2LJQ, 2E0W and 3C17, see Table S1), suggesting they too represent inactive states.

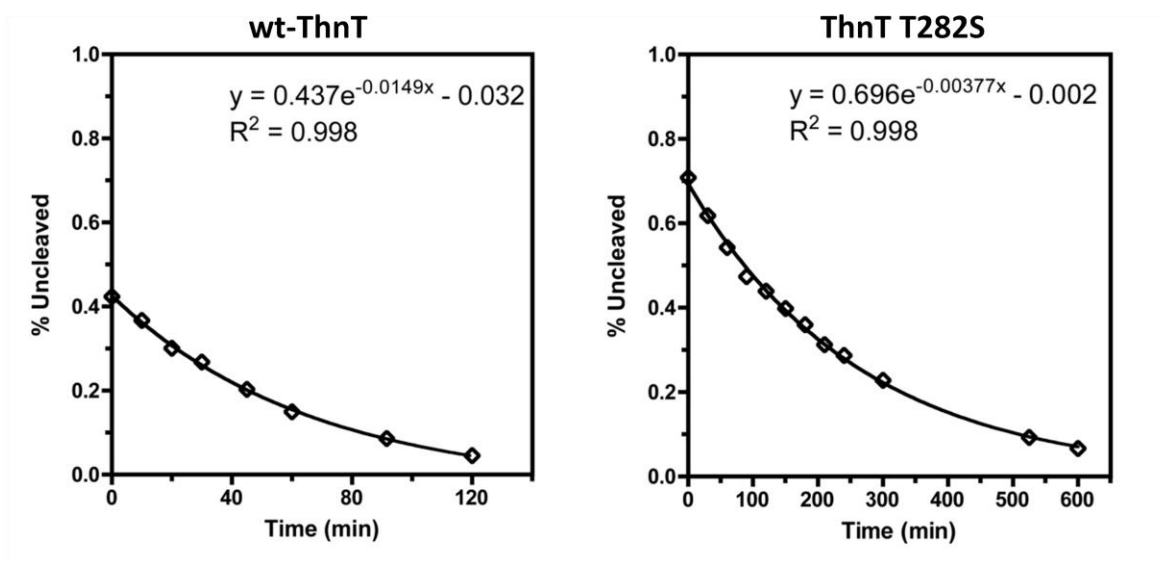

Fig. S5. Representative fits for kinetic analysis of autoproteolysis. Data were derived from densitometry measurements, as described in Materials and Methods. From three independent measurements  $k_{\text{autoproteolysis}}$  for wt-ThnT was determined to be  $k = 0.015 \pm 0.002 \text{ min}^{-1}$ ; for ThnT T282S,  $k = 0.00378 \pm 0.0002 \text{ min}^{-1}$ .

**Table S1.** Active site geometries of precursor *cis*-autoproteolytic proteins

| Enzyme                                       | Organism                           | Nucleophile | Variant | PDB  | Geometry of Nucleophile |     |       |             |     |         |       |     | Ref |
|----------------------------------------------|------------------------------------|-------------|---------|------|-------------------------|-----|-------|-------------|-----|---------|-------|-----|-----|
|                                              |                                    |             |         |      | Phi                     | Psi | Omega | Bin*        | RR† | P(RR) ‡ | RRE § |     |     |
| ThnT (State A)                               | Streptomyces cattleya              | Thr         | T282C   | 3S3U | 87                      | 114 | 177   | (90,110)    | g-  | 0.632   | 1.6   |     |     |
| Proteasome (beta subunit)                    | Thermoplasma acidophilum           | Thr         | T1A     | ---- | 75                      | 158 | 177   | (80,160)    | g-  | 0.08    | 0.6   | 7   |     |
| ThnT (State B)                               | Streptomyces cattleya              | Thr         | T282C   | 3S3U | -175                    | 170 | 159   | (-170,170)  | g+  | <0.001  |       |     |     |
| Glycosylasparaginase                         | Elizabethkingia meningoseptica     | Thr         | T152C   | 2LJQ | -175                    | 166 | 161   | (-170,170)  | g+  | <0.001  |       | 34  |     |
| Glycosylasparaginase                         | Elizabethkingia meningoseptica     | Thr         | W11F    | 9GAF | -150                    | 146 | 160   | (-150, 150) | g-  | 0.076   | 0.8   | 19  |     |
| Glycosylasparaginase                         | Elizabethkingia meningoseptica     | Thr         | T152A   | 9GAA | -69                     | 160 | -167  | (-70, 160)  | N/A | N/A     |       | 34  |     |
| $\gamma$ -Glutamyltranspeptidase             | Escherichia coli                   | Thr         | T391A   | 2E0W | 176                     | 180 | 175   | (180,180)   | g+  | <0.001  |       | 39  |     |
| L-Asparaginase EcAIII                        | Escherichia coli                   | Thr         | T178A   | 3C17 | -176                    | 176 | 178   | (-180, 180) | g+  | <0.001  |       | 40  |     |
| L-Asparaginase EcAIII                        | Escherichia coli                   | Thr         | T178A   | 2ZAK | -82                     | 179 | -174  | (-80, 180)  | N/A | N/A     |       | 41  |     |
| Taspase1                                     | Homo sapiens                       | Thr         | D233A   | 2A8I | -80                     | 173 | 179   | (-80, 170)  | N/A | N/A     |       | 24  |     |
| Glutaryl 7-aminocephalosporanic Acid Acylase | <i>Pseudomonas</i> sp. strain GK16 | Ser         | S170A   | 1OQZ | -176                    | 162 | 175   | (180,160)   | g+  | 0.729   |       | 29  |     |
| Cephalosporin Acylase                        | <i>Pseudomonas diminuta</i>        | Ser         | S170A   | 1KEH | -174                    | 170 | 178   | (-170,170)  | g+  | 0.884   |       | 28  |     |
| Penicillin V Acylase                         | <i>Bacillus sphaericus</i>         | Cys         | C4S     | 2IWM | 166                     | 161 | 172   | (170,160)   | g+  | 0.805   |       | N/A |     |
| Isopenicillin N Acylase                      | <i>Penicillium chrysogenum</i>     | Cys         | C103A   | 2X1C | -169                    | 155 | 168   | (-170,160)  | g+  | 0.855   |       | 35  |     |

\* Rounded (phi, psi) angles from the geometry found in the X-ray crystal structure

† RR = Reactive rotamer, determined by ability to satisfy B-D trajectory, allowing for minor conformational changes.

‡ Probability of forming RR determined from backbone-dependent rotamer distributions in (29) using a 5% smoothing library.

§ RRE estimated by the ratio P(RR,Thr)/P(RR, Ser). Value only displayed if both terms are >0.001 and Thr is the wild-type nucleophile. This value

**Table S2. Data collection, MAD and refinement statistics**

| Modification                 | <u>native</u>                    | <u>ethyl mercury phosphate</u>   |             |             |
|------------------------------|----------------------------------|----------------------------------|-------------|-------------|
| Space group                  | P2 <sub>1</sub> 2 <sub>1</sub> 2 | P2 <sub>1</sub> 2 <sub>1</sub> 2 |             |             |
| Cell dimensions (Å)          | a,b,c = 140.5, 68.7, 73.8        | a,b,c = 140.6, 69.0, 73.8        |             |             |
| <b>Data Processing</b>       |                                  |                                  |             |             |
| Wavelength (Å)               | 0.8001                           | 1.0036                           | 0.7336      | 1.1010      |
| Resolution (Å)               | 50 - 1.60                        | 50 - 1.65                        | 50 - 1.9    | 50 - 1.77   |
| Last Bin                     | 1.65 - 1.60                      | 1.70-1.65                        | 1.97-1.9    | 1.86-1.77   |
| No. Observations             | 606,444                          | 520,220                          | 447,896     | 503,903     |
| Completeness (%)             | 94.5 (68.3)                      | 94.1 (54.8)                      | 100 (100)   | 99.3 (93.4) |
| $R_{merge}$ (%)              | 5.8 (66.4)                       | 4.8 (34.8)                       | 6.0 (51.1)  | 4.4 (45.9)  |
| I/ $\sigma$ I                | 31.1 (1.2)                       | 34.2(2.2)                        | 36.4 (4.62) | 50.0 (3.7)  |
| Redundancy                   | 6.8 (3.7)                        | 6.8 (3.3)                        | 7.5 (7.4)   | 7.2 (5.5)   |
| <b>Refinement</b>            |                                  |                                  |             |             |
| Total no. of reflections     | 84968                            |                                  |             |             |
| Total no. of atoms           | 5923                             |                                  |             |             |
| No. of waters                | 713                              |                                  |             |             |
| FOM                          | 0.881                            |                                  |             |             |
| $R_{work}$ (%)               | 15.8 (33.6)                      |                                  |             |             |
| $R_{free}$ (%)               | 19.1 (36.3)                      |                                  |             |             |
| Ramachandran plot allowed, % | 99.8                             |                                  |             |             |
| Favored, %                   | 98.6                             |                                  |             |             |
| Outliers, %                  | 0.2                              |                                  |             |             |

Values in parenthesis are for the highest resolution shell (1.65 - 1.60 Å)

$R_{merge}$  is  $\Sigma|I_o - I| / \Sigma I_o$ , where  $I_o$  is the intensity of an individual reflection, and  $I$  is the mean intensity for multiply recorded reflections

$R_{work}$  is  $\|F_o - F_c\| / F_o$ , where  $F_o$  is an observed amplitude and  $F_c$  a calculated amplitude;

$R_{free}$  is the same statistic calculated over a 5% subset of the data that has not been included during refinement.
